# Supplementary material
Source: PubMed Central journal article supplement (PMC7816326)

Figure S1. Effect of cetuximab on the viability of Caco-2, HCT 116 and HT-29 cells.

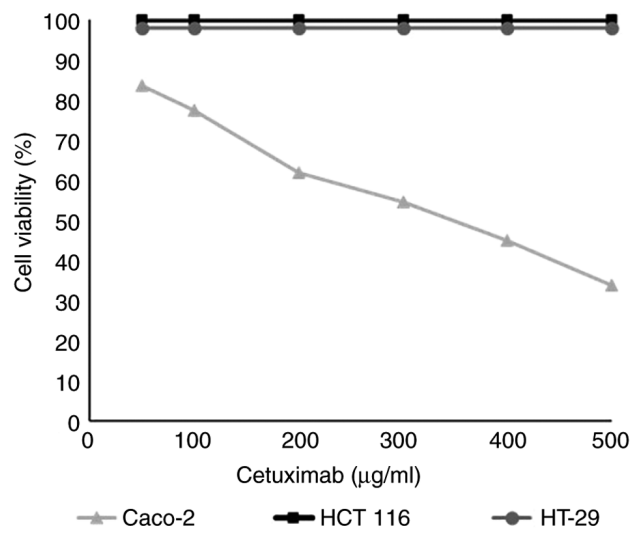

Supplement: Supplementary_Data.pdf [file Supplementary_Data.pdf]
